# Supplementary material for: COVID-19 Related Distress Is Associated With Alcohol Problems, Social Media and Food Addiction Symptoms: Insights From the Italian Experience During the Lockdown
Source: PubMed Central journal article supplement (PMC7723899; doi:10.3389/fpsyt.2020.577135), 2020-11-25
Supplement: Table_1.pdf [file Table_1.pdf]

**Supplementary Table 1.** *Intercorrelations among variables investigated in the Study.*

|                                     | 1         | 2        | 3         | 4         | 5         | 6        | 7 |
|-------------------------------------|-----------|----------|-----------|-----------|-----------|----------|---|
| 1 – IES-R<br>Total score            | –         |          |           |           |           |          |   |
| 2 – CAGE<br>Total score             | 0.123***  | –        |           |           |           |          |   |
| 3 – BSMAS<br>Total score            | 0.407***  | 0.118*** | –         |           |           |          |   |
| 4 – mYFAS 2.0<br>Total score        | 0.295***  | 0.127*** | -0.311*** | –         |           |          |   |
| 5 – I7 impulsiveness<br>Total score | 0.260***  | 0.199*** | 0.274***  | 0.235***  | –         |          |   |
| 6 – Age                             | -0.204*** | -0.045   | -0.328*** | -0.143*** | -0.143*** | –        |   |
| 7 – self-reported BMI               | -0.046    | -0.023   | -0.071**  | 0.227***  | -0.007    | 0.170*** | – |

Note: \*\* $p < 0.01$ ; \*\*\* $p < 0.001$

Abbreviation:

IES-R= Impact of Event Scale – Revised; CAGE = self-report measure of alcohol use problems; BSMAS= Bergen Social Media Addiction Scale; mYFAS 2.0= modified Yale Food Addiction Scale Version 2.0; BMI= Body Mass Index;
